# Supplementary material for: Relationship Between Rapid Skin Clearance and Quality of Life Benefit: Post Hoc Analysis of Japanese Patients with Moderate-to-Severe Psoriasis Treated with Ixekizumab (UNCOVER-J)
Source: PubMed Central journal article supplement — Dermatol Ther (Heidelb). 2020 Sep 10;10(6):1397–404. doi: 10.1007/s13555-020-00441-4 (PMC7649171; doi:10.1007/s13555-020-00441-4), 2020-09-10
Supplement: 13555_2020_441_MOESM1_ESM.pdf [file 13555_2020_441_MOESM1_ESM.pdf]

**Relationship between rapid skin clearance and quality of life benefit: post hoc analysis of Japanese patients with moderate-to-severe psoriasis treated with ixekizumab (UNCOVER-J)**

Masaru Honma, Zhihong Cai, Russel Burge, Baojin Zhu, Sohiya Yotsukura, Hitoe Torisu-Itakura

**Supplementary Material**

**Table S1.** Independent Ethics Committees For UNCOVER-J

| <b>Site Number</b> | <b>Name and Address</b>                                                                                                                                                          |
|--------------------|----------------------------------------------------------------------------------------------------------------------------------------------------------------------------------|
| 110                | Hokkaido University Hospital Institutional Review Board<br>Kita 14 Nishi 5, Kita-ku, Sapporo, Hokkaido, Japan                                                                    |
| 111                | Asahikawa Medical College Hospital Institutional Review Board<br>1-1-1 Midorigaoka Higashi 2Jyo, Asahikawa, Hokkaido, Japan                                                      |
| 112                | Iwate Medical University Hospital Institutional Review Board<br>19-1 Uchimaru, Morioka, Iwate, Japan                                                                             |
| 113                | Saitama Medical University Hospital Institutional Review Board<br>38 Morohongo Moroyama-Machi, Iruma-Gun, Saitama, Japan                                                         |
| 114                | Tokyo Teishin Hospital Institutional Review Board<br>2-14-23 Fujimi, Chiyoda-Ku, Tokyo, Japan                                                                                    |
| 115                | Jikei University School of Medicine Institutional Review Board<br>3-19-18 Nishishinbashi, Minato-Ku, Tokyo, Japan                                                                |
| 116                | The University of Tokyo Hospital Institutional Review Board<br>7-3-1 Hongo, Bunkyo-ku, Tokyo, Japan                                                                              |
| 118                | Showa University Hospital Institutional Review Board<br>1-5-8, Hatanodai, Shinagawa-ku, Tokyo, Japan                                                                             |
| 119                | Tokyo Medical University Hospital Institutional Review Board<br>6-7-1 Nishi-Shinjuku, Shinjuku-ku, Tokyo, Japan                                                                  |
| 120                | Keio University Hospital Institutional Review Board<br>35 Shinano-Machi, Shinjuku-Ku, Tokyo, Japan                                                                               |
| 121                | Tokyo Women's Medical University Hospital Institutional Review Board<br>8-1 Kawada-cho, Shinjuku-ku, Tokyo, Japan                                                                |
| 122                | Kyorin University Hospital Institutional Review Board<br>6-20-2 Shinkawa, Mitaka, Tokyo, Japan                                                                                   |
| 123                | NTT Medical Center Tokyo Institutional Review Board<br>5-9-22 Higashi, Gotanda, Shinagawa-ku, Tokyo, Japan                                                                       |
| 124                | Tokai University Hospital Institutional Review Board<br>143 Shimokasuya, Isehara, Kanagawa, Japan                                                                                |
| 125                | Kanazawa University Hospital Institutional Review Board<br>13-1 Takara-Machi, Kanazawa, Ishikawa, Japan                                                                          |
| 126                | Shinshu University Hospital Institutional Review Board<br>3-1-1 Asahi, Matsumoto, Nagano, Japan                                                                                  |
| 127                | Gifu University Hospital Institutional Review Board<br>Gifu University Hospital, 1-1 Yanagido, Gifu 501-1194, Japan                                                              |
| 128                | Mie University Hospital Institutional Review Board<br>Mie University Hospital, 2-174 Edobashi, Tsu, Mie 514-8507, Japan                                                          |
| 129                | Kyoto University Hospital Institutional Review Board<br>54 Shogoin Kawaharacho Sakyo-Ku , Kyoto, Japan                                                                           |
| 130                | Osaka University Hospital Institutional Review Board<br>2-15 Yamadaoka, Suita, Osaka, Japan                                                                                      |
| 131                | Kinki University Hospital Institutional Review Board; Kinki University<br>Hospital, Faculty of Medicine, Institutional Review Board<br>380 Nishiyama, Osaka-Sayama, Osaka, Japan |
| 132                | Nissay Hospital Institutional Review Board<br>6-3-8 Itachibori Nishi-ku, Osaka, Japan                                                                                            |
| 133                | Okayama University Hospital, Institutional Review Board<br>2-5-1 Shikata-Cho, Kita-ku, Okayama, Japan                                                                            |
| 134                | Ehime University Hospital Institutional Review Board<br>Shitsukawa, Toon, Ehime, Japan                                                                                           |
| 135                | Kyushu University Hospital Institutional Review Board<br>3-1-1 Maidashi, Higashi-ku, Fukuoka, Japan                                                                              |
| 136                | Kurume University Hospital Institutional Review Board<br>67 Asahi-Machi, Kurume, Fukuoka, Japan                                                                                  |

| <b>Site Number</b> | <b>Name and Address</b>                                                                                                                                                               |
|--------------------|---------------------------------------------------------------------------------------------------------------------------------------------------------------------------------------|
| 137                | Kumamoto University Hospital Institutional Review Board<br>1-1-1 Honjo, Chuo-ku, Kumamoto, Japan                                                                                      |
| 138                | Miyazaki Medical University Hospital Institutional Review Board<br>University of Miyazaki Hospital; Institutional Review Board<br>5200 Kihara Kiyotake-Cho, Miyazaki, Miyazaki, Japan |
